# Supplementary material
Source: PubMed Central journal article supplement (PMC3523865)
Supplement: 1213241109_pnas.201213241SI.pdf [file 1213241109_pnas.201213241SI.pdf]

# Supporting Information

Suprynowicz et al. 10.1073/pnas.1213241109

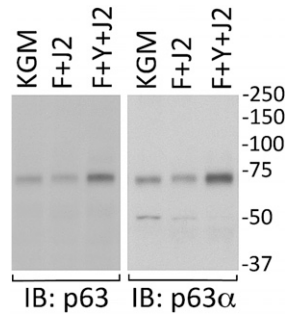

**Fig. S1.**  $\Delta$ Np63 $\alpha$  is the only detectable p63 isoform in HECs. Whole cell lysates of HECs growing in KGM, or in F-medium in the presence or absence of 10  $\mu$ M Y-27632, were analyzed on Western blots labeled with an antibody that detects all p63 isoforms (IB: p63) or a p63 $\alpha$ -specific antibody (IB: p63 $\alpha$ ). Molecular mass markers (in kDa) are shown on the right. A 72-kDa band is detected by both antibodies, which corresponds to the apparent molecular weight of  $\Delta$ Np63 $\alpha$  on SDS polyacrylamide gels (1).

1. Petitjean A, et al. (2008) Properties of the six isoforms of p63: p53-like regulation in response to genotoxic stress and cross talk with DeltaNp73. *Carcinogenesis* 29(2):273–281.

## (A) Differentiated HFK CRCs

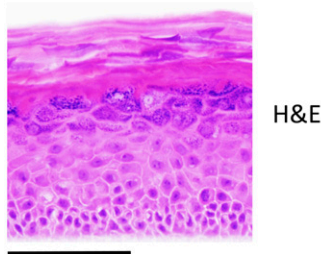

H&E

## (B) Differentiated tracheal-bronchial CRCs

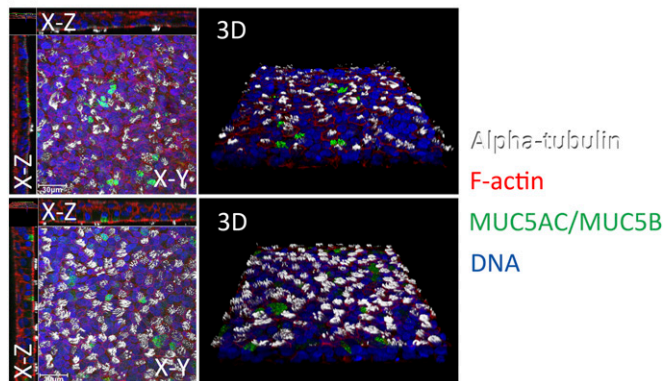

**Fig. S2.** Additional examples of the maintenance of tissue-specific developmental potential in CRCs. (A) H&E-stained histological section of primary human foreskin keratinocyte (HFK) CRCs that differentiated into a stratified squamous epithelium in air–liquid interface culture upon removal of Y-27632 and feeder cells. (Scale bar: 100  $\mu$ m.) (B) Confocal microscopy of tracheal-bronchial CRCs from two additional donors that differentiated into pseudostratified mucociliary epithelia in air–liquid interface cultures upon removal of Y-27632 and feeders. The cultures were fixed using paraformaldehyde and fluorescently labeled with phalloidin (F-actin), Hoechst dye 33342 (DNA), or antibodies demonstrating the presence of cilia (alpha-tubulin) and mucins 5A and 5B (MUC5AC/MUC5B). Two X–Z cross-sections, an extended focus X–Y view and corresponding three-dimensional (3D) view are shown for each culture.

**Table S1. Properties of stem cells and stem-like cells**

| Property             | ESCs       | iPSCs             | CRCs                     |
|----------------------|------------|-------------------|--------------------------|
| Origin               | Blastocyst | Adult mesenchymal | Adult epithelial         |
| Telomerase           | High       | High              | High                     |
| Telomere length      | Maintained | Maintained        | Decrease, then stabilize |
| Immortal             | Yes        | Yes               | Yes (conditional)        |
| Pluripotent          | Yes        | Yes               | No                       |
| Tumorigenic          | Yes        | Yes               | No                       |
| Karyotypic stability | No         | No                | Yes                      |
| Rapid generation     | No         | No                | Yes                      |
| Rapid reversal       | No         | No                | Yes                      |

**Table S2. Antibodies used in the study by Suprynowicz et al.**

| Antigen              | Source               | Antibody type     | Application |
|----------------------|----------------------|-------------------|-------------|
| Integrin $\alpha 6$  | Epitomics            | Rabbit monoclonal | WB          |
| Integrin $\beta 1$   | Epitomics            | Rabbit monoclonal | WB          |
| p63 $\alpha$         | Santa Cruz           | Rabbit polyclonal | WB          |
| p63                  | Santa Cruz           | Mouse monoclonal  | WB          |
| CD44                 | Cell Signaling       | Mouse monoclonal  | WB          |
| Notch-1              | Epitomics            | Rabbit monoclonal | WB          |
| Notch ICD            | Epitomics            | Rabbit monoclonal | WB          |
| DLL-1                | Abcam                | Rabbit polyclonal | WB          |
| GAPDH                | Santa Cruz           | Rabbit polyclonal | WB          |
| Integrin $\alpha 6$  | Southern Biotech     | Mouse monoclonal  | FC          |
| E-cadherin           | Santa Cruz           | Mouse monoclonal  | FC          |
| $\beta$ -Catenin     | Santa Cruz           | Mouse monoclonal  | WB          |
| Lamin A              | Santa Cruz           | Rabbit polyclonal | WB          |
| Transferrin receptor | BD/Transduction Labs | Mouse monoclonal  | WB          |
| $\beta$ -Actin       | Sigma                | Mouse monoclonal  | WB          |
| Sox2                 | Epitomics            | Rabbit monoclonal | WB          |
| Oct4                 | Santa Cruz           | Goat polyclonal   | WB          |
| Nanog                | Abcam                | Rabbit polyclonal | WB          |
| Klf4                 | Abcam                | Rabbit polyclonal | WB          |
| c-Myc                | Abcam                | Rabbit polyclonal | WB          |
| Involucrin           | Santa Cruz           | Rabbit polyclonal | IF          |
| Cytokeratin 14       | Abcam                | Mouse monoclonal  | IF          |
| Filaggrin            | Thermo/Lab Vision    | Mouse monoclonal  | IF          |
| $\alpha$ -Tubulin    | Millipore            | Rat monoclonal    | IF          |
| Mucin 5AC            | Thermo/Lab Vision    | Mouse monoclonal  | IF          |
| Mucin 5B             | John Sheehan*        | Rabbit polyclonal | IF          |

FC, flow cytometry; IF, immunofluorescence microscopy; WB, Western blot.

\*Cystic Fibrosis/Pulmonary Research and Treatment Center, University of North Carolina, Chapel Hill, NC 27599.
